# Supplementary material for: Physical and chemical constraints on transformation and mass-increase of fine aerosols in northeast Asia
Source: Copernicus journal article supplement (doi:10.5194/acp-2020-1247), 2021-03-24
Supplement: Supplementary file 1 [file acp-2020-1247-supplement.pdf]

1  
2  
3  
4  
5  
6  
7  
8  
9  
10  
11  
12  
13  
14  
15  
16  
17  
18  
19  
20  
21  
22

*Supplement of*

**Physical and chemical constraints on transformation and mass-increase of  
fine aerosols in northeast Asia**

Saehee Lim et al.

*Correspondence to:* Meehye Lee ([meehye@korea.ac.kr](mailto:meehye@korea.ac.kr))

23 **Supplementary Text**

24 **Text S1. Calculations of Particle Growth Rate (GR) and Condensation Sink (CS)**

25 **Particle Growth Rate**

26 The particle growth rate (GR) describes the change in the particle diameter within a time period when a new  
27 particle formation occurs. The GR during the period of the top 10% of EOF1 was calculated via the maximum-  
28 concentration method (Kulmala et al., 2012), using the following equation:

29 
$$GR_{Dp_1 \sim Dp_2} = \frac{Dp_2 - Dp_1}{t_{Dp_2,max} - t_{Dp_1,max}}$$

30 where  $Dp$  is the particle diameter (nm), and  $t_{Dp}$  is the time when the maximum number concentration of  $Dp$   
31 occurs.

32 Here, GR was defined by the linear least-squares fit of points ( $t_{Dp,max}$ ,  $Dp$ ) in the size range of 10–25 nm.  
33 Consequently, the calculated mean  $\pm$  SD of  $GR_{10-25}$  was  $2.13 \pm 1.90$  nm h<sup>-1</sup>.

34 **Condensation Sink**

35 The condensation sink (CS) describes the rate at which condensable gaseous molecules condense on pre-existing  
36 particles. The loss rate of molecules can be obtained by integrating over the particle size spectrum (Kulmala et  
37 al., 2001; Pirjola et al., 1999):

38

39 
$$CS = 2\pi D \sum_{Dp} \beta_{m,Dp} Dp N_{Dp}$$

40 where  $N_{Dp}$  is the number concentration of  $Dp$ ,  $D$  is the diffusion coefficient, and  $\beta_{m,Dp}$  denotes the  
41 transitional regime correction factor. The factor  $\beta_{m,Dp}$  can be calculated by applying *Fuchs theory* and the  
42 approach given below (Fuchs, 1965; Seinfeld and Pandis, 2006).

43 
$$\beta_F = \frac{\overline{C_A} R_p}{\overline{C_A} R_p + 4D}$$

44 As  $R_p = \frac{Dp}{2}$ , the equation be rewritten as

45

$$\beta_F = \frac{\overline{C_A} D_p}{\overline{C_A} D_p + 8D}$$

46

$\overline{C_A}$  indicates the mean speed of the molecules, which can be expressed as  $C_A = \sqrt{\frac{8kT}{\pi m_A}}$ . We consider D as the

47

diffusion coefficient of H<sub>2</sub>SO<sub>4</sub> in air and set  $D_{\text{H}_2\text{SO}_4} = 0.104$  (0.091–0.113) cm<sup>2</sup> s<sup>-1</sup>, which was calculated via the

48

FSG/LaBas method (<https://www3.epa.gov/ceampubl/learn2model/part-two/onsite/estdiffusion-ext.html>). The

49

CS values in the sizes of 10–25 nm and 100–470 nm were calculated for the top 10% of both EOF1 and EOF2.

50

Consequently, CS<sub>10–25nm</sub> and CS<sub>100–470nm</sub> were  $0.011 \pm 0.020$  ( $\times 10^{-2}$  s<sup>-1</sup>) and  $1.26 \pm 0.86$  ( $\times 10^{-2}$  s<sup>-1</sup>), respectively,

51

for EOF; the corresponding values for EOF2 were  $0.002 \pm 0.003$  ( $\times 10^{-2}$  s<sup>-1</sup>) and  $1.76 \pm 1.04$ , respectively.

52

53

54

55

56

57

58

59

60

61

62

63

64

65

66

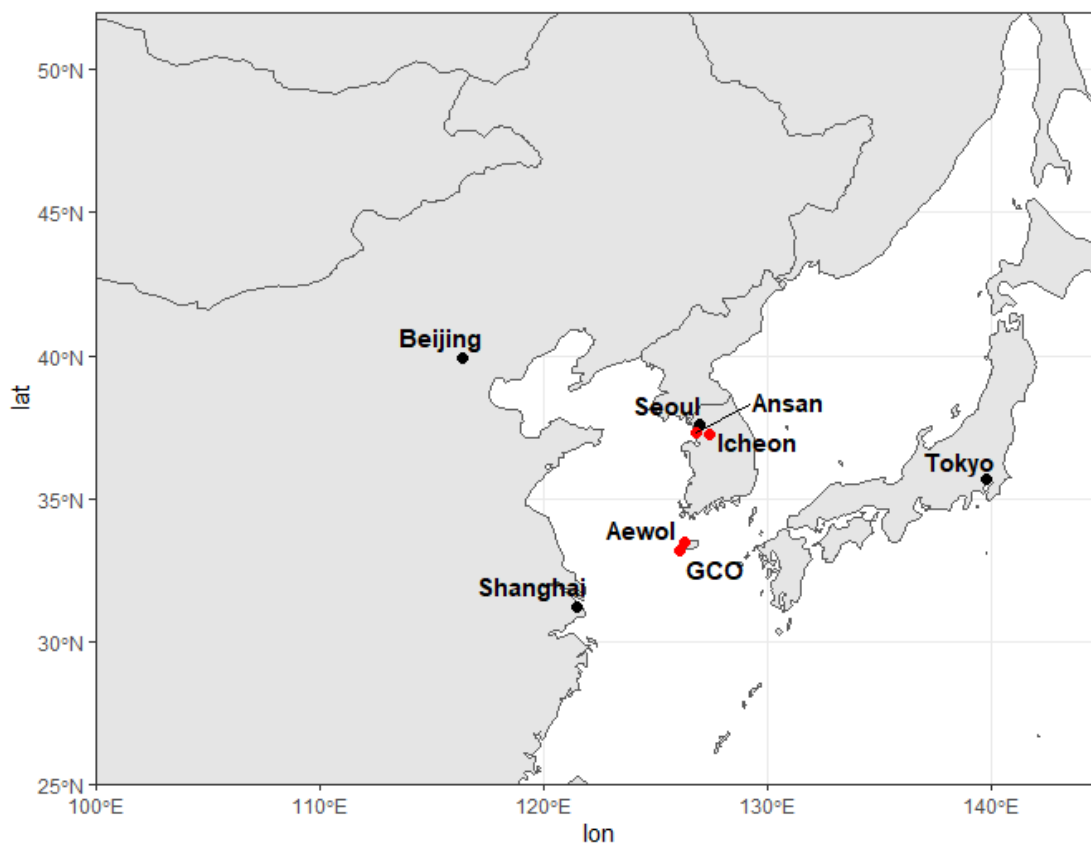

68

69 Figure S1. Map of the study region. Red points denote measurement sites: Jeju Air Quality Research Center in  
70 Aewol (33.21° N, 126.23° E, 600 m asl) and Gosan Climate Observatory (GCO; 33.17° N, 126.10° E)  
71 in Jeju island, and Seoul (37.61° N, 126.93° E), Ansan (33.17° N, 126.10° E, 70 m asl), and Icheon  
72 (37.27° N, 127.43° E) in Seoul metropolitan area (SMA).

73 a)

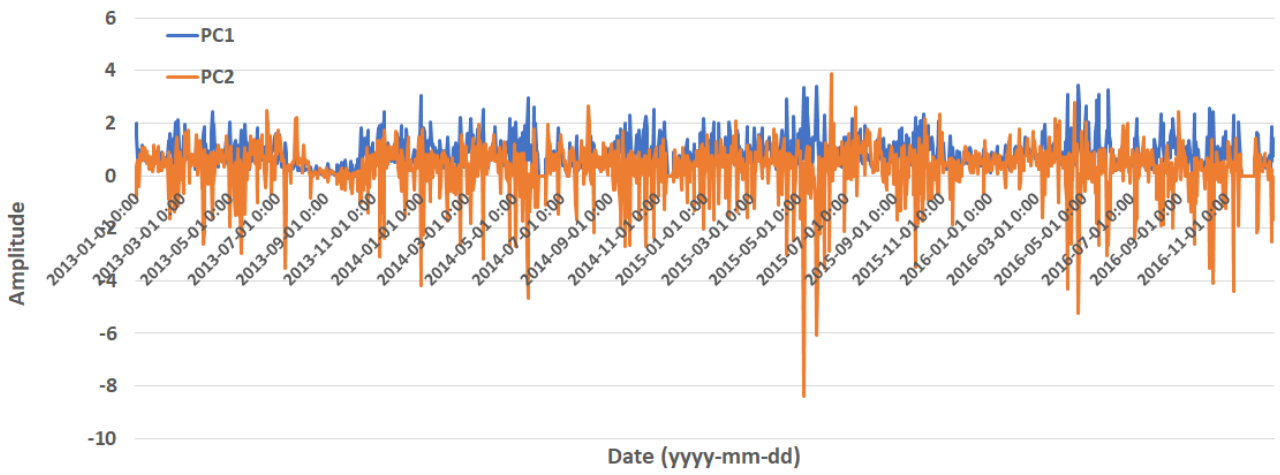

74

75 b)

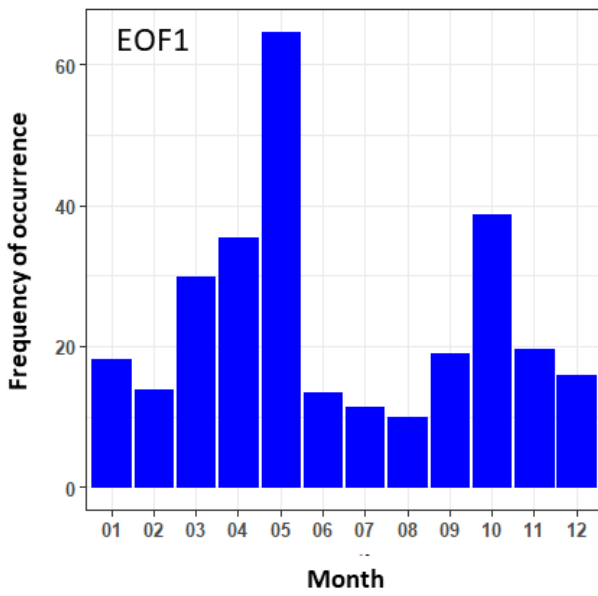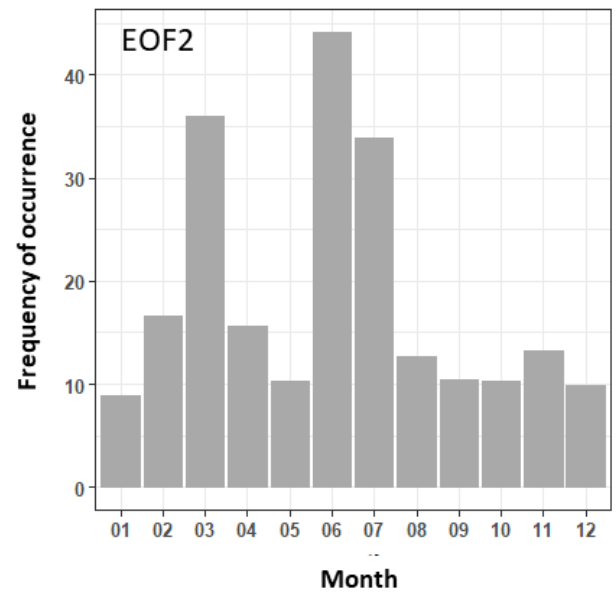

76

77 Figure S2. Summary of two major PC time series. (a) Amplitude of PC1 and PC2. (b) Monthly frequency of  
 78 occurrence for days with top 10% amplitudes of PC1 and PC2, referred to as “EOF1” and “EOF2”.

79

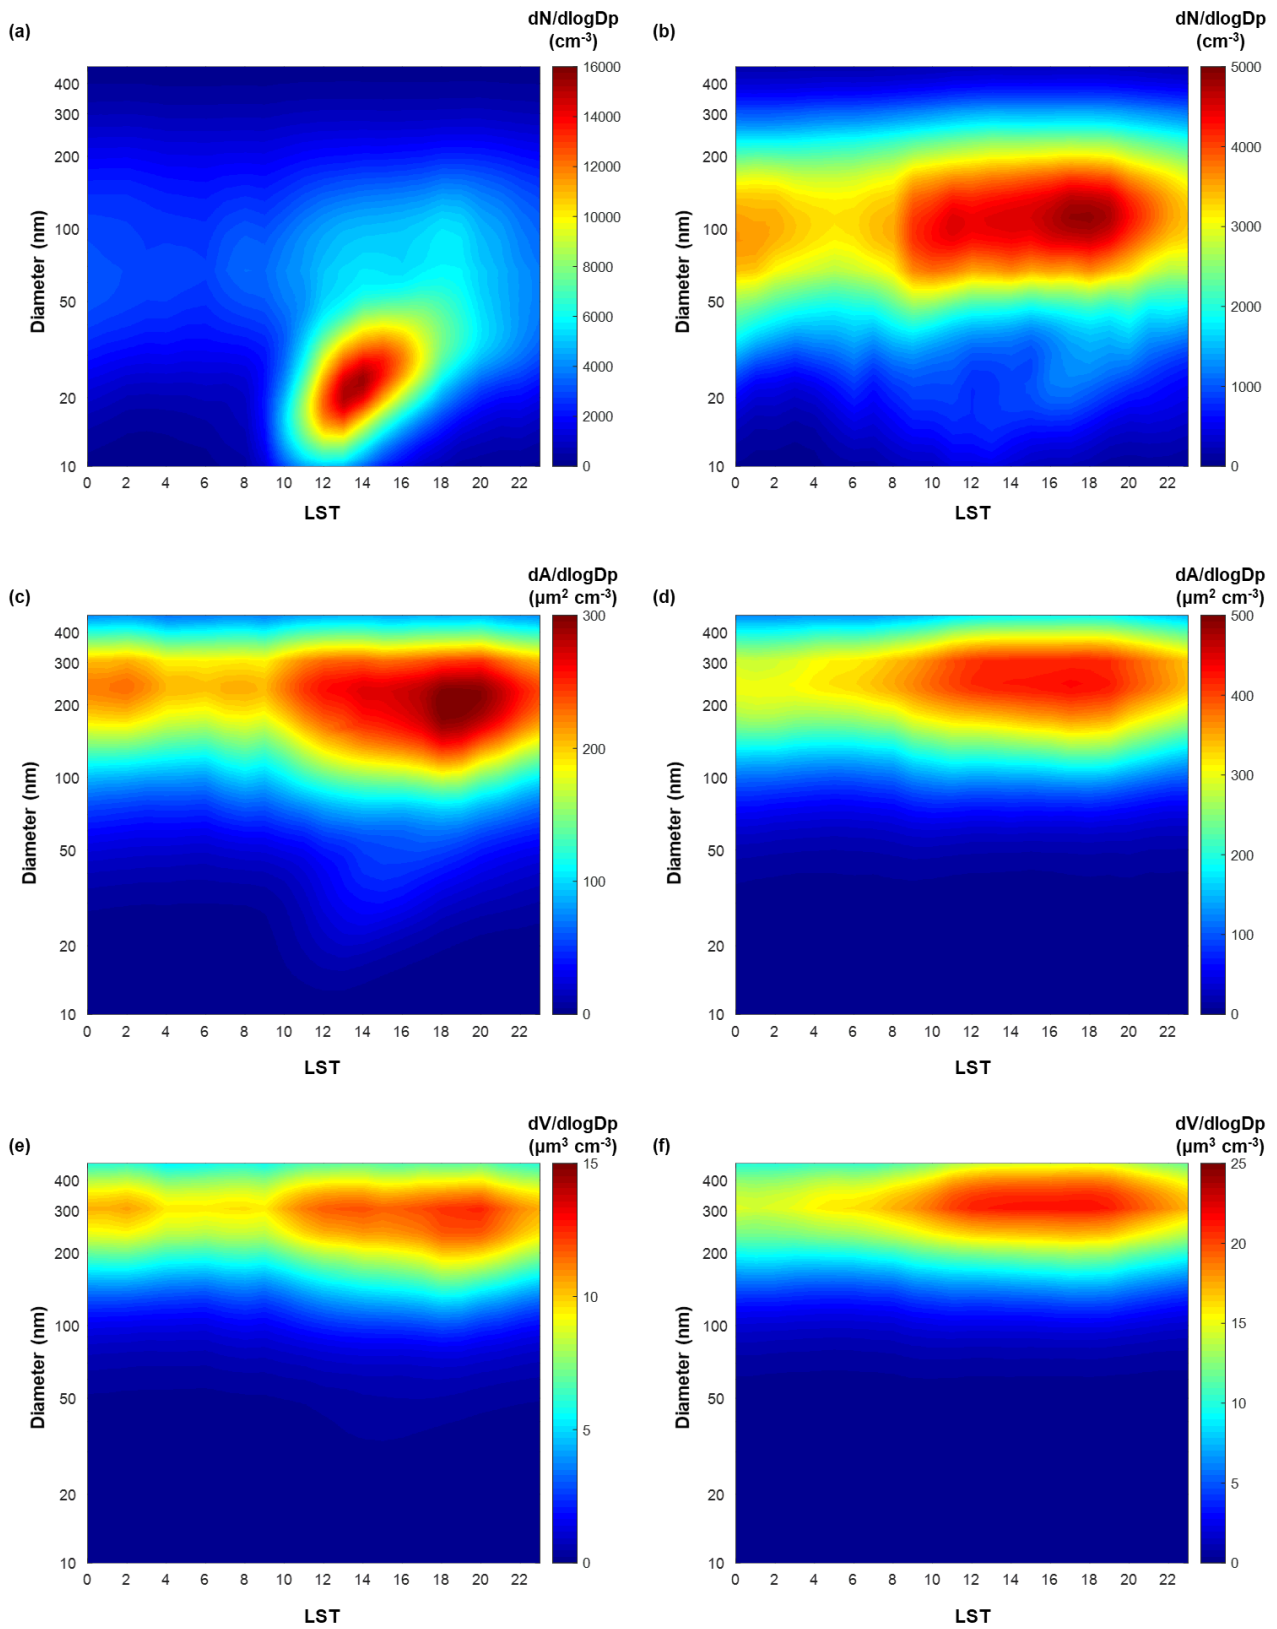

80

81 Figure S3. Aerosol size distributions of EOF1 (left panels) and EOF2 (right panels). (a) and (b) aerosol number

82 size distributions, (c) and (d) aerosol surface size distributions, and (e) and (f) aerosol volume size  
83 distributions.

84

85 a)

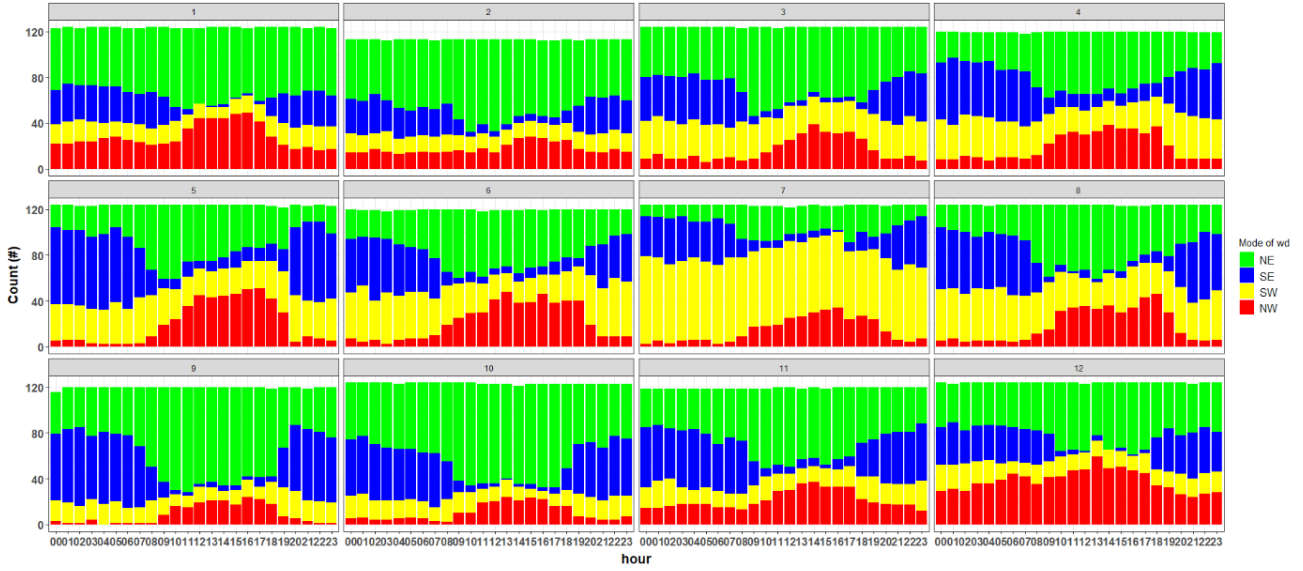

86

87 b)

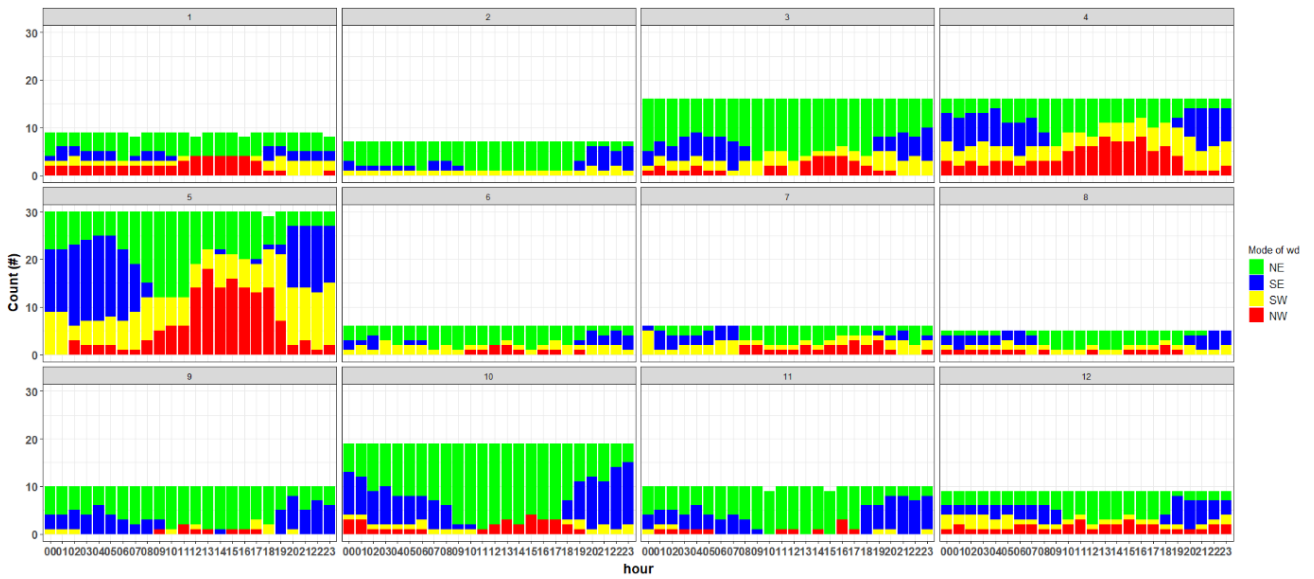

88

89 c)

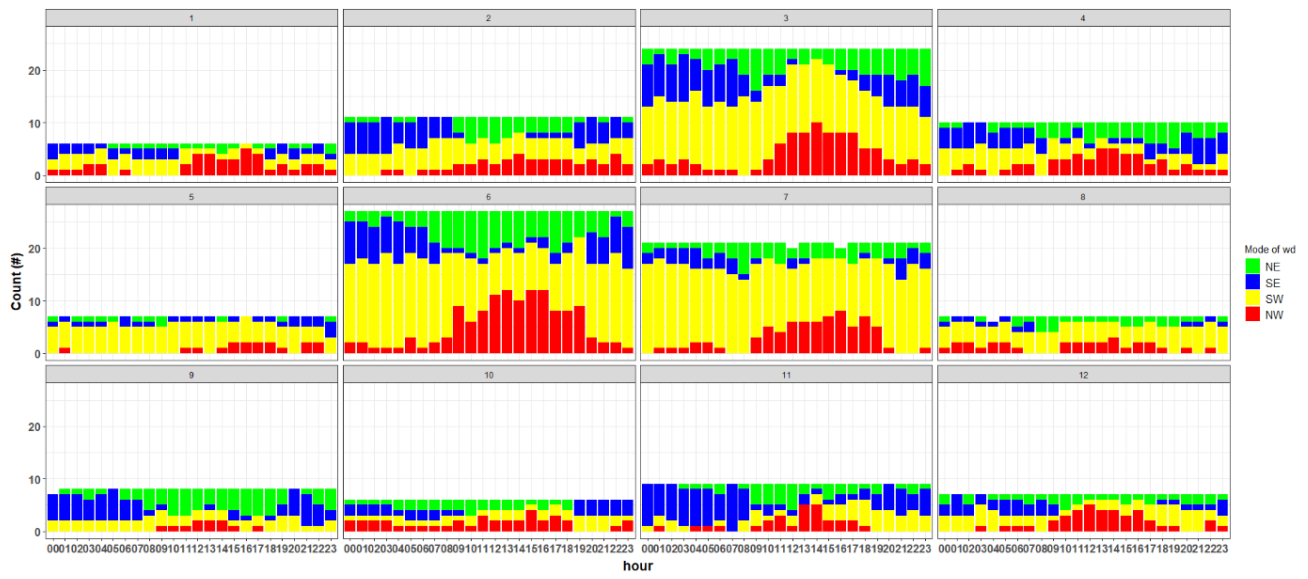

90

91 Figure S4. Monthly count of hourly wind sector. (a) Entire period of years 2013–2016, (b) EOF1 period, (c)  
 92 EOF2 period. Wind directions were categorized into “NE,” “SE,” “SW,” and “NW” directions.

93



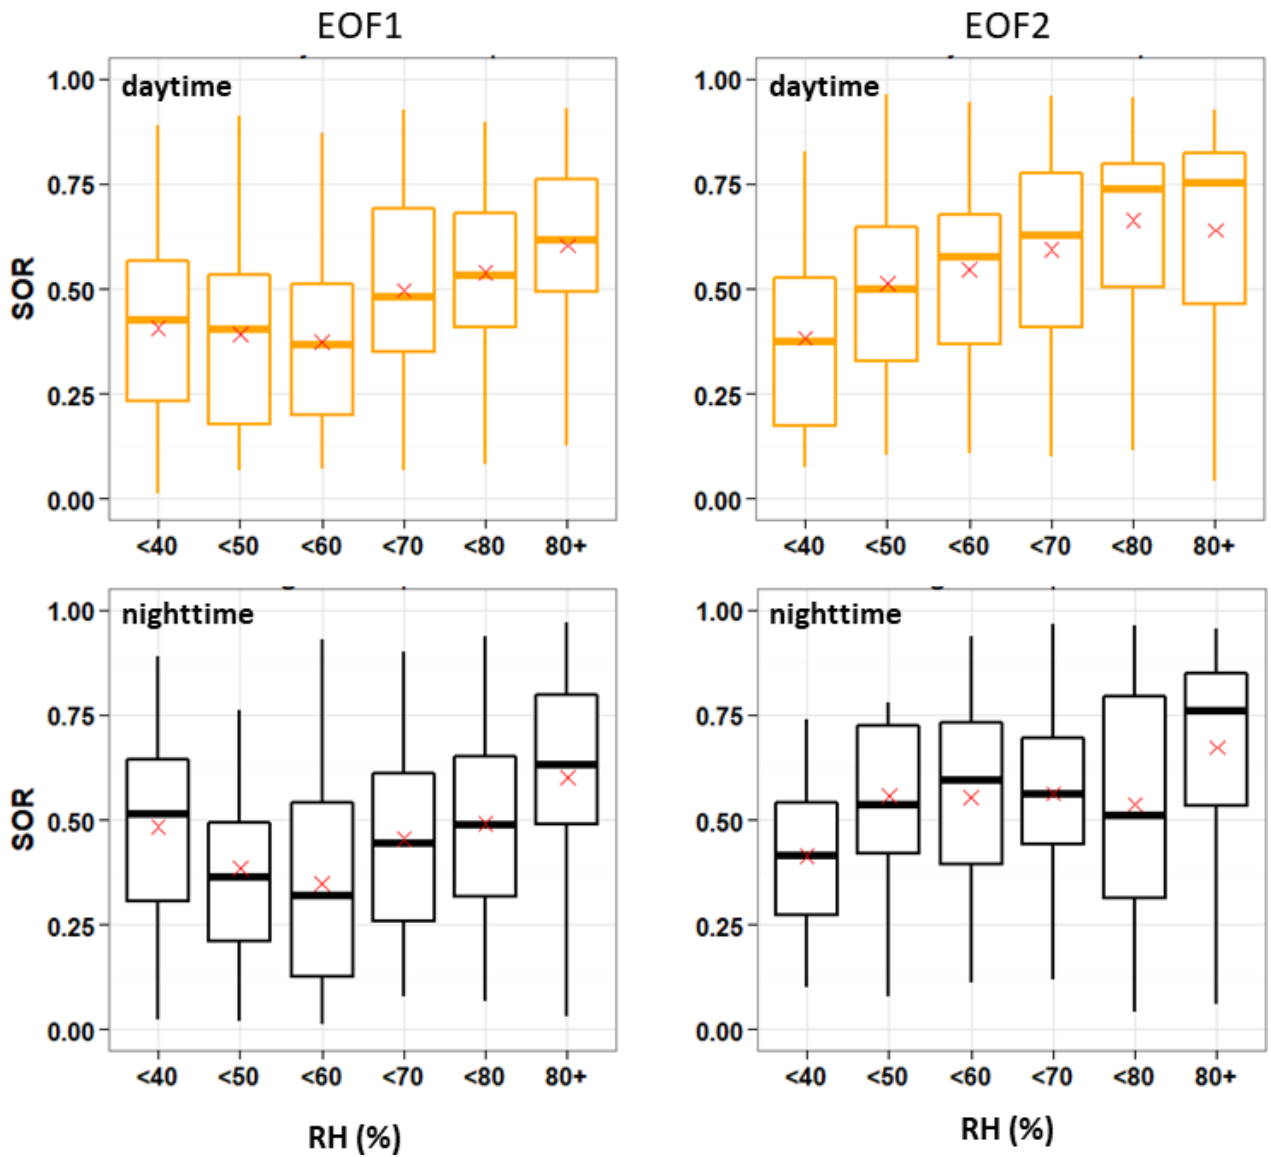

94

95 Figure S5. Variations of sulfur oxidation ratio (SOR) as a function of RH for EOF1 (left panels) and EOF2 (right  
 96 panels) during daytime (8 a.m.–7 p.m. in local time; top panels) and nighttime (8 p.m.–7 a.m. in local  
 97 time; bottom panels).

98

99

100

101

102

103

104 References

- 105 Fuchs, V. R.: Toward a theory of poverty, concept poverty Task force Econ. growth Oppor. Chamb.  
106 Commer. he U.S., 69–91, 1965.
- 107 Kulmala, M., Maso, M. D., Mäkelä, J. M., Pirjola, L., Väkevä, M., Aalto, P., Miikkulainen, P., Hämeri, K. and  
108 O’ Dowd, C. D.: On the formation, growth and composition of nucleation mode particles, *Tellus B Chem.*  
109 *Phys. Meteorol.*, 53(4), 479–490, doi:10.3402/tellusb.v53i4.16622, 2001.
- 110 Kulmala, M., Petäjä, T., Nieminen, T., Sipilä, M., Manninen, H. E., Lehtipalo, K., Dal Maso, M., Aalto, P. P.,  
111 Junninen, H., Paasonen, P., Riipinen, I., Lehtinen, K. E. J., Laaksonen, A. and Kerminen, V.-M.: Measurement  
112 of the nucleation of atmospheric aerosol particles, *Nat. Protoc.*, 7(9), 1651–1667,  
113 doi:10.1038/nprot.2012.091, 2012.
- 114 Pirjola, L., Kulmala, M., Wilck, M., Bischoff, A., Stratmann, F. and Otto, E.: Formation of sulphuric acid  
115 aerosols and cloud condensation nuclei: An expression for significant nucleation and model comparison, *J.*  
116 *Aerosol Sci.*, 30(8), 1079–1094, doi:10.1016/S0021-8502(98)00776-9, 1999.
- 117 Seinfeld, J. H. and Pandis, S. N.: *Atmospheric Chemistry and Physics: From Air Pollution to Climate*  
118 *Change*, John Wiley & Sons, New York., 2006.
- 119
